# Supplementary material for: Biosynthesis of l-alanine from cis-butenedioic anhydride catalyzed by a triple-enzyme cascade via a genetically modified strain
Source: Royal Society of Chemistry journal article supplement (doi:10.1039/d1gc02244j), 2021-01-01
Supplement: d1gc02244j1.pdf [file d1gc02244j1.pdf]

1 *Green Chemistry*

2

3

### Supplementary information

4

5

#### 6 **Supplementary method**

##### 7 **Calculation of the amount of wastewater**

8       The titer of L-alanine produced by the fermentation method is about 120.8 g/L  
9 (Applied Biochemical Biotechnology, 178:324-337), and the wastewater for producing  
10 1 ton of L-alanine is  $1/0.12=8.3$  tons.

11       Whole-cell catalysis was carried out in a reactor containing 2.5 M maleic acid  
12 and recombinant cells with  $OD_{600}=20$ . The  $OD_{600}$  of cells cultivated by high-density  
13 fermentation was about 100, and cells were harvested by centrifuge and used for 5  
14 batches of biocatalysis. During the catalysis-extraction circulation process, one liter of  
15 the reaction solution was re-utilized, and 5 batches of fresh cells were supplemented.  
16 After 5 batches of biocatalysis, the final reaction was precipitated with methanol (about  
17 600 mL) on ice. The total yield of L-alanine was 890 g, and the total amount of  
18 wastewater was approximate 2.5 L (1 liter was from the fermentation broth, and 1.5  
19 liters was from the reaction and precipitation solution). Thus, the wastewater for 1 ton  
20 L-alanine is  $2.5/0.89=2.8$  tons.

21

22

23 **Supplementary Tables**

24

25 **Table S1. Primers constructed for the triple-enzyme cascade**

| Plasmids | Primes         | Sequences (5'-3')                            |
|----------|----------------|----------------------------------------------|
| pAM      | EcoRI-ASD-F    | gcgcc <u>gaattc</u> gatgagcaaggattatcagag    |
|          | NotI-ASD-R     | tttgcggccgctcagcgcttgttcc                    |
|          | NdeI-MaiA-F    | gcgcatatgatgagcaaccactac                     |
|          | XhoI-MaiA-R    | tttctcgagtcataagcgccgg                       |
|          | BamHI-MaiA-F   | tttgatccatgagcaaccactaccgc                   |
| pMA      | HindIII-MaiA-R | gttaagcttcaataagcgccggacag                   |
|          | NdeI-ASD-F     | <u>catatg</u> atgagcaaggattatcagagtctggcgaac |
|          | XhoI-ASD-R     | tttctcgagtcagcgcttgttcc                      |

26 Note: restriction sites are underlined.

27

**Table S2. Conversion rates of the whole cell catalysis**

| Host strain                                                  | Biomass<br>(OD <sub>600</sub> ) | Concentration of<br>substrate (M) | Time<br>(h) | Molar<br>conversion (%) |
|--------------------------------------------------------------|---------------------------------|-----------------------------------|-------------|-------------------------|
| <i>E. coli</i> BL21                                          | 20                              | 2.0                               | 6           | 22.2                    |
|                                                              |                                 |                                   | 10          | 71.0                    |
|                                                              |                                 |                                   | 22          | 86.8                    |
| -----                                                        |                                 |                                   |             |                         |
| <i>E. coli</i> BL21<br><i>-ΔfumA/fumC</i>                    | 20                              | 2.0                               | 6           | 68.9                    |
|                                                              |                                 |                                   | 10          | 81.2                    |
|                                                              |                                 |                                   | 22          | 89.0                    |
| -----                                                        |                                 |                                   |             |                         |
| <i>E. coli</i> BL21<br><i>-ΔfumA/fumC-T<sub>7</sub>/AspA</i> | 10                              | 2.0                               | 6           | 71.3                    |
|                                                              |                                 |                                   | 10          | 93.6                    |
|                                                              | 20                              | 2.0                               | 4           | 78.1                    |
|                                                              |                                 |                                   | 6           | 94.9                    |
|                                                              | 20                              | 2.5                               | 6           | 69.6                    |
|                                                              |                                 |                                   | 10          | 95.6                    |
| -----                                                        |                                 |                                   |             |                         |
| <i>E. coli</i> BL21<br><i>-ΔfumA/fumC-T<sub>7</sub>/AspA</i> | 20                              | 3.0                               | 6           | 31.5                    |
|                                                              |                                 |                                   | 10          | 69.5                    |
|                                                              |                                 |                                   | 15          | 95.6                    |

## 31 Supplementary Figures

32

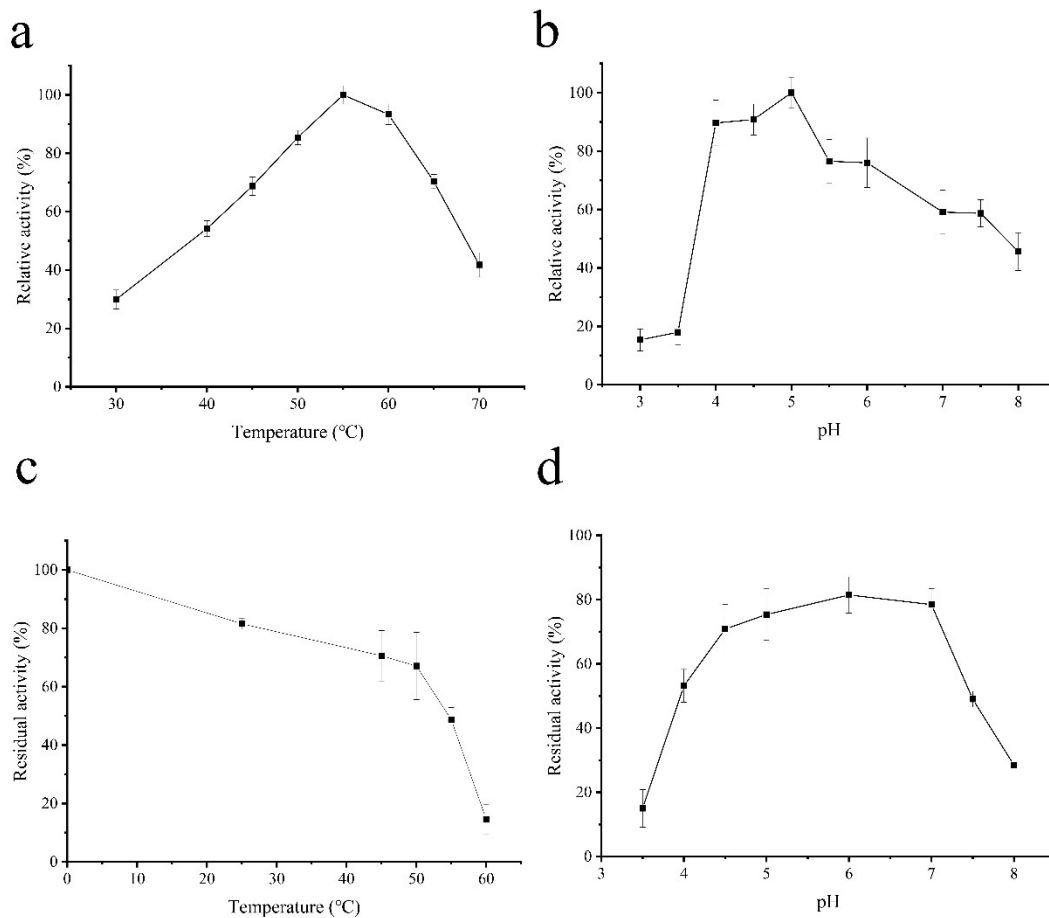

33

34 **Fig S1.** Enzymatic properties of purified *AtASD*. (a) The optimum temperature. The  
35 activities of *AtASD* were determined in phosphate buffer (pH 5.0) at various  
36 temperatures, and the highest activity was plotted as 100%. (b) The optimum pH. The  
37 activities of *AtASD* were determined at various pH values (phosphate buffer) and 55°C,  
38 and the highest activity was plotted as 100%. (c) The thermostability. *AtASD* was  
39 incubated at various temperatures for 30 min, and the activity of *AtASD* without  
40 treatment was plotted as 100%. (d) The pH stability. *AtASD* was incubated in phosphate  
41 buffer (pH 3.0-8.0) on ice overnight, and the activity of *AtASD* without treatment was  
42 plotted as 100%. All reactions contained 0.5 mM PLP and 1 mM  $\alpha$ -ketoglutaric acid.

43

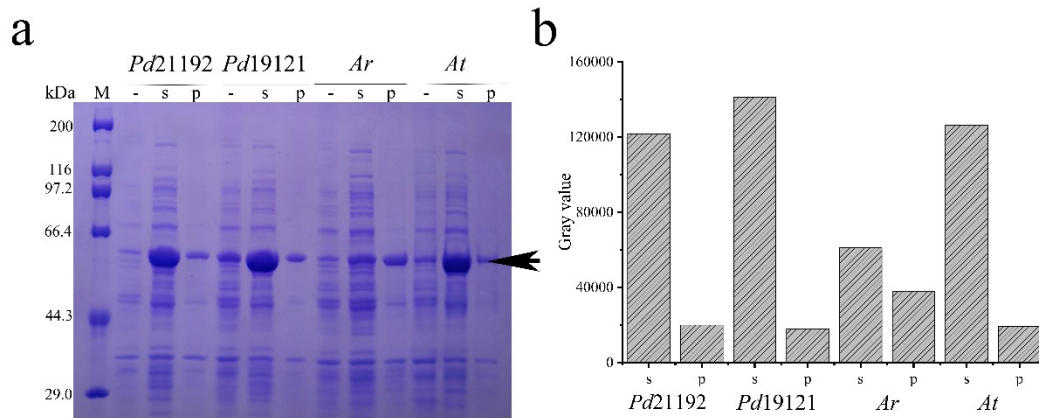

44

45 **Fig S2.** Expression level analysis of recombinant ASDs. (a) SDS-PAGE analysis of  
 46 recombinant ASDs. -: noninduced cells; S: supernatants of cell lysates; P: precipitation  
 47 of cell lysates. Recombinant ASDs were indicated by an arrow. (b) Semiquantitative  
 48 analysis by ImageJ software. The gray value of the target protein was plotted as Y-axis.

49

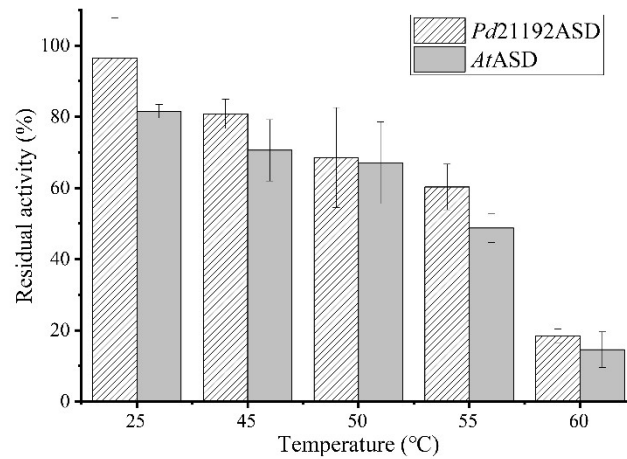

50

51 **Fig S3.** Comparison of thermostability of purified *AtASD* and *Pd21192ASD*. *AtASD*  
 52 and *Pd21192ASD* were incubated at various temperatures for 30 min, and the activities  
 53 of purified *AtASD* and *Pd21192ASD* without treatment were plotted as 100%. The  
 54 activity of *AtASD* was determined at pH 5.0 and 55°C, and the activity of *Pd21192ASD*  
 55 was determined at pH 5.0 and 45°C. All reactions contained 0.5 mM PLP and 1 mM  $\alpha$ -  
 56 ketoglutaric acid.

57

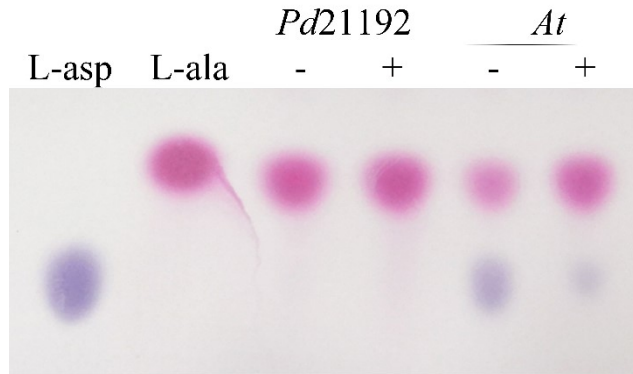

58

59 **Fig S4.** Effects of PLP on the catalytic abilities of recombinant strains expressing  
60 *At*ASD and *Pd21192*ASD. The amounts of L-alanine and L-aspartic acid synthesized  
61 from fumaric acid were detected by thin plate chromatography. The reaction was  
62 carried out at pH 5.0 and 37°C for 4 h. The biomass was OD<sub>600</sub>=10, and the substrate  
63 of fumaric acid was 0.2 M. The standards of 0.1 M L-aspartic acid (L-asp) and L-alanine  
64 (L-ala) were dotted in the left columns. -: reactions without the addition of PLP; +:  
65 reactions containing 0.1 mM PLP.

66

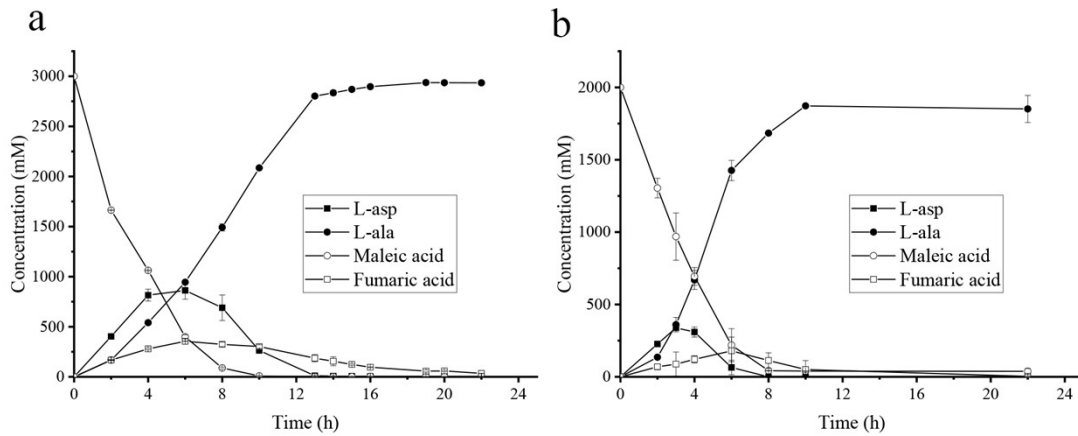

67

68 **Fig S5.** Whole-cell catalysis using the recombinant strain *E. coli* BL21- $\Delta$ *fumA/fumC*-  
 69 T<sub>7</sub>/AspA harboring pAM. (a) The biomass was  $OD_{600}=20$  and the substrate of maleic  
 70 acid was 3.0 M. (b) The biomass was  $OD_{600}=10$  and the substrate of maleic acid was  
 71 2.0 M. The reaction was carried out at pH 7.5 and 37°C. The concentrations of L-alanine  
 72 (L-ala, solid circle), L-aspartic acid (L-asp, solid square), fumaric acid (open square),  
 73 and maleic acid (open circle) were measured by HPLC.

74
